# Supplementary material for: Primary Care Physician Referral Patterns for Behavioral Health Diagnoses
Source: Atypon-hosted journal article supplement (doi:10.1176/appi.ps.201900004), 2020-01-03
Supplement: appi.ps.201900004.ds001.pdf [file appi.ps.201900004.ds001.pdf]

**Online Supplement:**

## Appendix A: Coding of Behavioral Health Conditions Using ICD-9 Codes

| <b>Visit Diagnosis</b>                                           | <b>ICD-9 Codes</b>                                                                     |
|------------------------------------------------------------------|----------------------------------------------------------------------------------------|
| Psychoses                                                        | 293.81, 293.82, 294.2-294.9, 295.x, 296.8, 296.9, 297.x, and 298.x,                    |
| Substance Use Disorders                                          |                                                                                        |
| Opioid use disorder                                              | 304.0, 304.7, and 305.5                                                                |
| Substance Use Disorder excluding opioid use disorder and tobacco | 291.x, 292.x, 303.x, 304.1-304.6, 304.8-304.9, 305.0; 305.2-305.4, 305.6-305.9         |
| Depression                                                       | 296.2, 296.3, 300.4, 311.x                                                             |
| All other behavioral health                                      | All remaining diagnoses between 290.x and 319.x not classified in the above categories |
| Non behavioral health diagnosis                                  | All other ICD-9 codes                                                                  |

**Note:** Categories are mutually exclusive. A hierarchical classification is used in the order presented in the table.

**Source:** Adapted from Golberstein et al. (2015) and Manhпра et al. (2018)

## Appendix B: Supplemental Tables

**Supplemental Table 1: Descriptive Statistics for Included Visits to Primary Care Physicians (2011-2015)**

|                                                           | Overall                      | Visit Results in a Referral  |                            |   |
|-----------------------------------------------------------|------------------------------|------------------------------|----------------------------|---|
|                                                           |                              | No                           | Yes                        |   |
| Mean (standard error) or %                                | (N=577,719,897;<br>n=20,313) | (N=480,977,196;<br>n=17,151) | (N=96,742,701;<br>n=3,162) |   |
| Referral to other physician                               | 16.7                         | 0                            | 100                        | * |
| Primary behavioral health diagnosis                       | 3.5                          | 3.3                          | 4.4                        | * |
| Depression                                                | 1.2                          | 1.1                          | 1.8                        | * |
| Psychoses                                                 | 0.3                          | 0.2                          | 0.7                        |   |
| Substance Use Disorder (excluding<br>opioid use disorder) | 0.1                          | 0.0                          | 0.2                        |   |
| Opioid Use Disorder                                       | 0.1                          | 0.1                          | 0.1                        |   |
| All other behavioral health diagnoses                     | 1.8                          | 1.9                          | 1.7                        |   |
| Major reason for visit                                    |                              |                              |                            |   |
| New problem (<3 mo onset)                                 | 82.3                         | 84.2                         | 72.6                       | * |
| Chronic problem, flare-up                                 | 17.7                         | 15.8                         | 27.4                       |   |
| Number of diagnoses for visit record                      | 2.3 (0.04)                   | 2.2 (0.04)                   | 2.5 (0.06)                 | * |
| <b>Patient characteristics</b>                            |                              |                              |                            |   |
| Patient is female                                         | 59.9                         | 59.8                         | 60.0                       |   |
| Patient age in years                                      | 53.7                         | 53.5                         | 54.7                       |   |
| Patient race / ethnicity                                  |                              |                              |                            |   |
| Non-Hispanic White                                        | 69.2                         | 69.6                         | 67.2                       |   |
| Non-Hispanic Black                                        | 10.9                         | 10.7                         | 12.2                       |   |
| Hispanic                                                  | 14.0                         | 13.7                         | 15.4                       |   |
| Non-Hispanic Other                                        | 5.9                          | 6.1                          | 5.2                        |   |
| Expected source of payment                                |                              |                              |                            | * |
| Private Insurance                                         | 55.2                         | 55.1                         | 55.9                       |   |
| Medicare                                                  | 29.3                         | 29.4                         | 28.7                       |   |
| Medicaid                                                  | 8.4                          | 8.1                          | 10.1                       |   |
| Other - worker's comp, self-pay, no<br>charge, and other  | 7.1                          | 7.4                          | 5.3                        |   |
| Patient comorbidities                                     |                              |                              |                            |   |
| Arthritis                                                 | 17.3                         | 16.0                         | 23.6                       | * |
| Asthma                                                    | 7.5                          | 7.2                          | 9.0                        |   |
| Cancer                                                    | 4.0                          | 3.9                          | 4.5                        |   |
| Chronic renal failure                                     | 3.8                          | 3.3                          | 6.3                        | * |
| Coronary artery disease / Ischemic Heart<br>Disease       | 4.8                          | 4.4                          | 6.8                        | * |
| Diabetes                                                  | 15.4                         | 15.0                         | 17.5                       |   |
| Cerebrovascular disease                                   | 2.1                          | 1.9                          | 3.3                        |   |
| Congestive Heart Failure                                  | 2.5                          | 2.4                          | 3.3                        |   |
| Chronic Obstructive Pulmonary Disease                     | 6.9                          | 7.0                          | 6.3                        |   |
| Hyperlipidemia                                            | 27.0                         | 26.1                         | 31.4                       | * |
| Hypertension                                              | 36.8                         | 36.8                         | 36.4                       |   |
| Obesity                                                   | 10.7                         | 10.3                         | 13.0                       | * |
| Osteoporosis                                              | 4.1                          | 3.8                          | 5.9                        | * |

**Note:** \* indicates difference significant at  $p < 0.05$ . Statistical significance based on t-tests and chi-squared for categorical variables. Linearized standard errors in parentheses for continuous variables, accounting for sample design.
